# Supplementary material for: Roughness-dependent clogging of particle suspensions flowing into a constriction
Source: Royal Society of Chemistry journal article supplement (doi:10.1039/d1sm00738f), 2021-01-01
Supplement: d1sm00738f1.pdf [file d1sm00738f1.pdf]

## Electronic Supplementary Information for Roughness-dependent clogging of particle suspensions flowing into a constriction

Chiao-Peng Hsu,<sup>1,2</sup> Hasan Emre Baysal,<sup>1,3</sup> Görel Wirenborn,<sup>1,4</sup>  
Gustaf Mårtensson,<sup>5,6</sup> Lisa Prahl Wittberg,<sup>4</sup> and Lucio Isa<sup>1</sup>

<sup>1</sup>*Laboratory for Soft Materials and Interfaces,  
Department of Materials, ETH Zürich, 8093 Zürich, Switzerland.*

<sup>2</sup>*Present address: Lehrstuhl für Biophysik (E27),  
Technische Universität München, D-85748 Garching, Germany.*

<sup>3</sup>*Present address: Materials Engineering Department (MTM), KU Leuven, Leuven, Belgium.*

<sup>4</sup>*FLOW, Department of Engineering Mechanics, KTH, Stockholm, Sweden.*

<sup>5</sup>*Division of Nanobiotechnology, Department of Protein Science,  
Science for Life Laboratory, KTH Royal Institute of Technology, Solna, Sweden, Sweden.*

<sup>6</sup>*Mycronic AB, Täby, Sweden.*

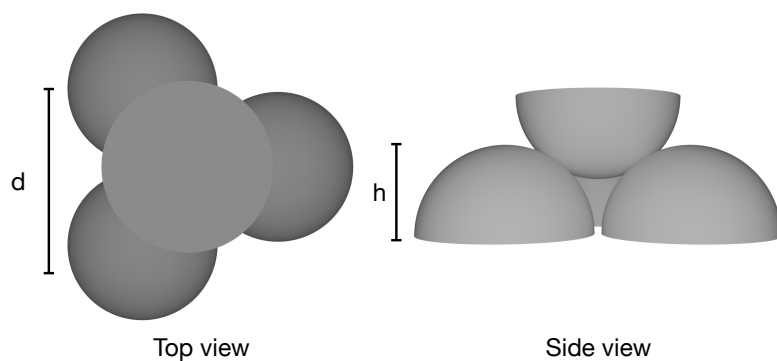

Supplementary Figure 1. **Asperity interlocking model.** Schematics of asperity interlocking modelled with hexagonally-packed semi-spheres. The effective particle size of the interlocked rough particles is modelled by representing the rough surface as a surface with hexagonally-packed semi-spheres, where the distance between the semi-spheres equals the average surface distance between asperities,  $d$ , and the radius of the semi-sphere equals the average asperity height,  $h$ .

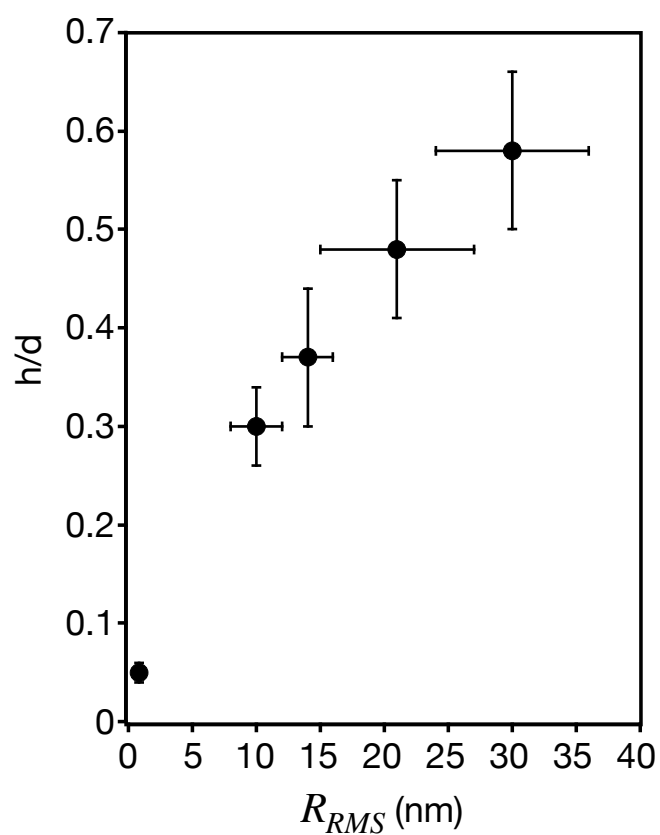

Supplementary Figure 2.  **$h/d$  and RMS roughness.** Correlation between  $h/d$  and RMS roughness for the particles utilized in this study. Each point represents one particle system. Error bars represent the standard deviations from AFM roughness measurements.

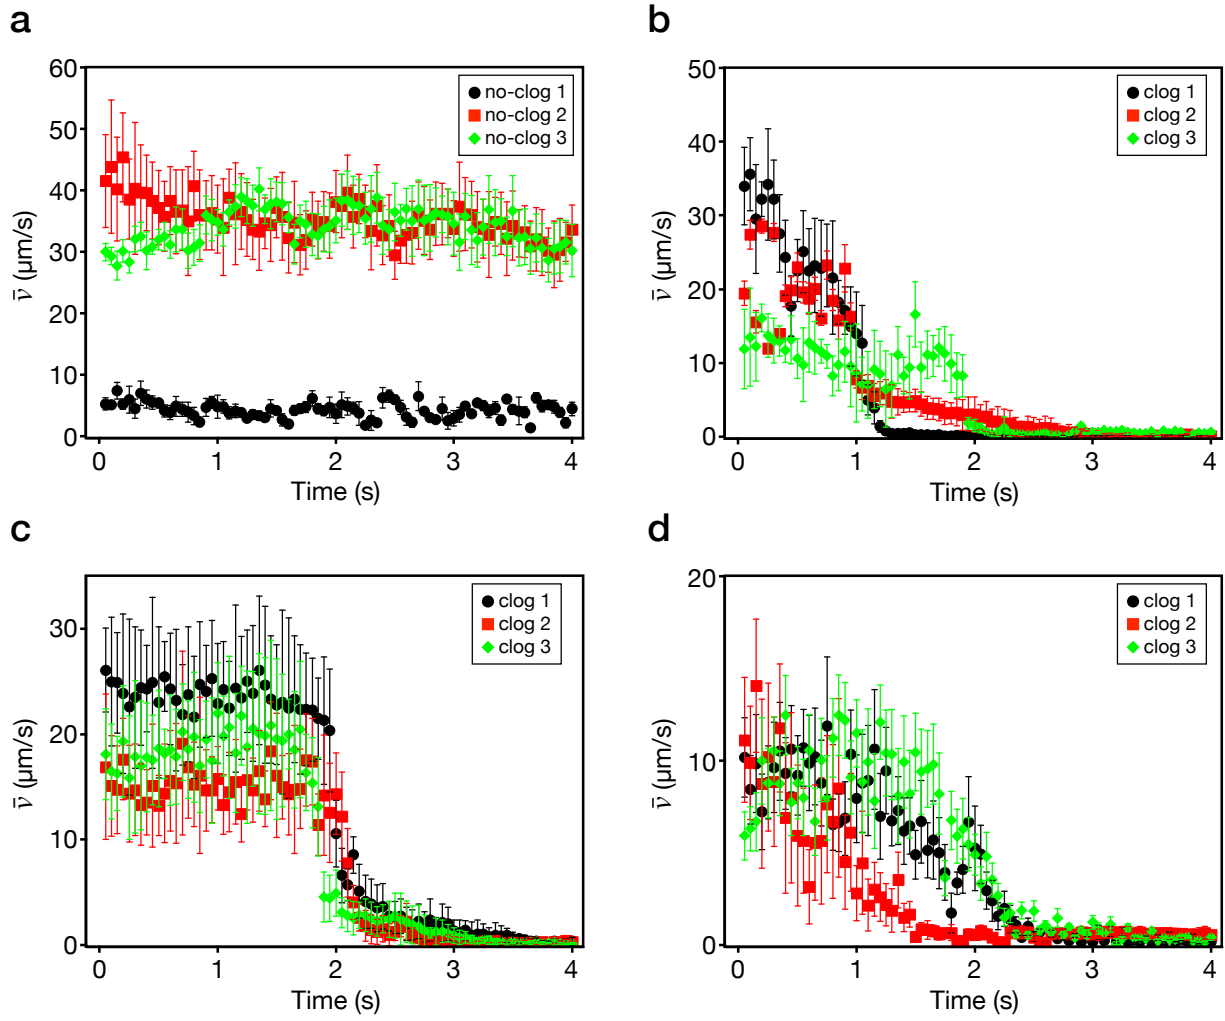

Supplementary Figure 3. **Temporal evolution of the mean velocity.** Time evolution of the mean velocity ( $\bar{v}$ ) of non-clogging flows for SM (a), clogging for RB\_10 (b), clogging for RB\_14 (c), and clogging for RB\_21 (d). Error bars represent the standard deviations of the velocity extracted from PIV measurements dividing each frame in a  $10 \times 10$  matrix.
